# Supplementary material
Source: publisher figshare collection journal article supplement (https://gsajournals.figshare.com/ndownloader/files/15368756)
Supplement: Supplementary file 1 [file 15368756]

## Sheet: Sheet1
Table S6: List of differentially downregulated genes with Stat92E binding sites
Flybase ID	Gene	Predicted Binding Sites	Fold Change	Adjusted p-value
FBgn0085385	bma	4	0.402561	0.00154084
FBgn0028496	CG30116	4	0.568424	0.00846872
FBgn0000489	Pka-C3	4	0.575549	0.00820819
FBgn0085422	CG34393	3	0.42557	0.00736694
FBgn0283651	CG46301	3	0.438394	0.000229327
FBgn0032629	beat-IIIc	3	0.539973	0.0369774
FBgn0036485	FucTA	3	0.550571	0.0198923
FBgn0033405	CG13954	3	0.572128	0.00523461
FBgn0004606	zfh1	3	0.599957	0.0353679
FBgn0052677	X11Lbeta	3	0.626858	0.0108961
FBgn0259171	Pde9	3	0.634723	0.0246914
FBgn0033652	ths	3	0.642296	0.0294817
FBgn0003117	pnr	2	0.208493	1.99571e-17
FBgn0036544	sff	2	0.369437	0.000746605
FBgn0011828	Pxn	2	0.393842	3.59815e-05
FBgn0083946	lobo	2	0.417767	0.00352787
FBgn0051760	CG31760	2	0.446147	0.00363903
FBgn0263974	qin	2	0.500562	0.00449687
FBgn0040601	CG13643	2	0.505541	0.0020049
FBgn0032439	Ref2	2	0.51669	0.0378857
FBgn0031813	CG9527	2	0.517245	0.000478542
FBgn0003888	betaTub60D	2	0.556622	0.00148159
FBgn0035976	PGRP-LC	2	0.557363	0.041036
FBgn0263617	CR43626	2	0.58978	0.0260418
FBgn0025390	Mur2B	2	0.617615	0.0450907
FBgn0041585	olf186-F	2	0.65404	0.020418
FBgn0260964	Vmat	1	0.285057	1.41353e-06
FBgn0260446	GABA-B-R1	1	0.303322	7.47376e-07
FBgn0039617	DIP-gamma	1	0.328786	4.64406e-05
FBgn0053547	Rim	1	0.338864	1.53989e-09
FBgn0037448	CG15186	1	0.356309	0.000446539
FBgn0036890	CG9368	1	0.389364	7.25186e-05
FBgn0031903	Wnt10	1	0.404808	0.000439985
FBgn0265984	CR44763	1	0.429464	0.00335627
FBgn0050158	CG30158	1	0.43782	0.000325393
FBgn0034082	CG10734	1	0.457375	0.00360456
FBgn0038163	CG10841	1	0.464513	0.000962516
FBgn0264488	CG43896	1	0.468844	0.000355416
FBgn0038160	CG9759	1	0.474918	0.00565426
FBgn0051921	CG31921	1	0.476682	0.00860543
FBgn0039225	Ets96B	1	0.484598	0.00478696
FBgn0266758	Esyt2	1	0.488134	0.0102288
FBgn0050106	CCHa1-R	1	0.497766	0.0299676
FBgn0051901	Mur29B	1	0.507768	0.00806443
FBgn0031424	VGlut	1	0.514014	0.00482308
FBgn0265959	rdgC	1	0.515348	0.0331259
FBgn0038674	CG14285	1	0.516292	0.049871
FBgn0010263	Rbp9	1	0.519106	0.00199089
FBgn0267257	CR45693	1	0.519527	0.0449722
FBgn0033968	hui	1	0.52403	0.00523461
FBgn0003060	CG9757	1	0.525277	0.0125358
FBgn0035625	Blimp-1	1	0.526976	0.0052931
FBgn0038833	CG15696	1	0.534885	0.0296315
FBgn0036232	CG14125	1	0.535022	0.0263431
FBgn0010114	hig	1	0.535122	0.00099155
FBgn0030161	CG15249	1	0.535586	0.0423721
FBgn0028704	Nckx30C	1	0.540123	0.0319878
FBgn0038832	CG15695	1	0.546506	0.00418721
FBgn0265985	CR44764	1	0.549077	0.0341134
FBgn0033760	CG8785	1	0.549606	0.0462097
FBgn0029082	hbs	1	0.54998	0.000392562
FBgn0005564	Shal	1	0.550041	0.0267923
FBgn0036741	CG7510	1	0.55826	0.00712953
FBgn0038752	CG4462	1	0.569525	0.0352637
FBgn0085409	smal	1	0.574206	2.62034e-05
FBgn0015522	olf186-M	1	0.578669	0.00771001
FBgn0052204	CG32204	1	0.591795	0.0489183
FBgn0029134	Prosbeta5	1	0.597483	0.00788328
FBgn0003513	ss	1	0.607742	0.00232402
FBgn0267136	CR45576	1	0.631012	0.0299798
FBgn0030305	Uba5	1	0.646548	0.00749302
FBgn0045038	Proc	1	0.6505	0.0211695
FBgn0010803	TrpRS	1	0.655356	0.0450014
FBgn0004839	otk	1	0.656724	0.00921807
FBgn0033177	CG11141	1	0.658055	0.0397227
FBgn0033192	Corin	1	0.663703	0.0391452
FBgn0013469	klu	1	0.665786	0.00673375
